# Supplementary material for: Screening of Natural Products and Approved Oncology Drug Libraries for Activity against Clostridioides difficile
Source: PubMed Central journal article supplement (PMC7136261; doi:10.1038/s41598-020-63029-0), 2020-04-06
Supplement: 41598_2020_63029_MOESM1_ESM.pdf [file 41598_2020_63029_MOESM1_ESM.pdf]

# **Screening of Natural Products and Approved Oncology Drug Libraries for Activity against *Clostridioides difficile***

Rusha Pal<sup>1</sup> and Mohamed N. Seleem<sup>1,2\*</sup>

<sup>1</sup> Department of Comparative Pathobiology, College of Veterinary Medicine, Purdue University, West Lafayette, IN, 47907, USA

<sup>2</sup> Purdue Institute of Inflammation, Immunology, and Infectious Disease, West Lafayette, IN, 47907, USA

\*Corresponding Author:

Mohamed N. Seleem

Department of Comparative Pathobiology

Purdue University College of Veterinary Medicine

625 Harrison St., West Lafayette, IN, 47907

Phone: 765-494-0763 Fax: 765-496-2627

**Table S1: Bacterial strains used in the study.**

| <b>Bacterial strains / ID number</b> | <b>Source and comments</b>                                                                                                                                   |
|--------------------------------------|--------------------------------------------------------------------------------------------------------------------------------------------------------------|
| P2 /NR-32883                         | Toxin producing strain isolated from patient stool in western Pennsylvania, USA in 2001                                                                      |
| P6/ NR-32886                         | Toxin producing strain isolated from the stool of a patient suffering from recurrent <i>C. difficile</i> infection in western Pennsylvania, USA in 2001      |
| P7/ NR-32887                         | Toxin producing strain procured from patient stool in western Pennsylvania, USA in 2001                                                                      |
| P8/ NR-32888                         | Toxin producing strain procured from patient stool in western Pennsylvania, USA in 2001                                                                      |
| P9/ NR-32889                         | Toxigenic strain procured from fecal matter of a patient suffering from recurrent <i>C. difficile</i> infection in western Pennsylvania, USA in 2001         |
| P19/ NR-32895                        | Toxigenic strain procured from fecal matter of a patient suffering from recurrent <i>C. difficile</i> infection in western Pennsylvania, USA in 2005         |
| Isolate 1/ NR-13427                  | Isolated from a patient diagnosed with CDI in the Mid-Atlantic region of the USA in 2008/2009                                                                |
| Isolate 2/ NR-13428                  | Isolated from a patient diagnosed with CDI in the Mid-Atlantic region of the USA in 2008/2009                                                                |
| Isolate 4/ NR-13430                  | Isolated from a patient diagnosed with CDI in the Mid-Atlantic region of the USA in 2008/2009                                                                |
| Isolate 6/ NR-13432                  | Isolated from a patient diagnosed with CDI in the Mid-Atlantic region of the USA in 2008/2009                                                                |
| Isolate 9/ NR-13435                  | Isolated from a patient diagnosed with CDI in the Mid-Atlantic region of the USA in 2008/2009                                                                |
| Isolate 1/ NR-13436                  | Isolated from a patient diagnosed with CDI in the Mid-Atlantic region of the USA in 2008/2009                                                                |
| Isolate 20100502/ NR-49277           | Isolated in 2010 from the fecal matter of an elderly male patient diagnosed with community-associated (CA) <i>C. difficile</i> infection in Colorado, USA    |
| Isolate 20100207/ NR-49278           | Isolated in 2010 from the stool of an elderly adult male patient diagnosed with healthcare-associated (HA) <i>C. difficile</i> infection in New York, USA    |
| Isolate 20100211/ NR-49279           | Isolated in 2010 from the stool sample of a pediatric female patient diagnosed with community-associated (CA) <i>C. difficile</i> infection in New York, USA |
| Isolate 20120016/ NR-49282           | Isolated in 2011 from the stool sample of a pediatric female patient diagnosed with community-associated (CA) <i>C. difficile</i> infection in New York, USA |

|                            |                                                                                                                                                                        |
|----------------------------|------------------------------------------------------------------------------------------------------------------------------------------------------------------------|
| Isolate 20110999/NR-49286  | Isolated in 2011 from the stool sample of an elderly female patient diagnosed with healthcare-associated (HA) <i>C. difficile</i> infection in western/midwestern, USA |
| Isolate 20110870/ NR-49288 | Isolated in 2011 from the stool sample of a young adult female patient diagnosed with healthcare associated (HA) <i>C. difficile</i> infection in Tennessee, USA       |
| Isolate 20120187/ NR-49290 | Isolated in 2011 from the stool sample of an elderly adult male patient with healthcare-associated (HA) <i>C. difficile</i> infection in Tennessee, USA                |
| ATCC BAA 1870              | Presence of <i>cdtB</i> <sup>a</sup> , <i>tcdA</i> <sup>b</sup> , and <i>tcdB</i> <sup>c</sup> genes, classified as toxinotype IIIB, ribotype 027                      |

<sup>a</sup> *cdtB*= *C. difficile* binary toxin

<sup>b</sup> *tcdA*= *C. difficile* toxin A gene

<sup>c</sup> *tcdB*= *C. difficile* toxin B gene

**Table S2: Initial screening data, chemical structure, and description of the hits for the approved oncology drugs set V library against *C. difficile* ATCC BAA 1807.**

|   | Compound name | Chemical structure                                                                   | MIC (μM) | Description and use                                                                                                                                      |
|---|---------------|--------------------------------------------------------------------------------------|----------|----------------------------------------------------------------------------------------------------------------------------------------------------------|
| 1 | Ponatinib     | 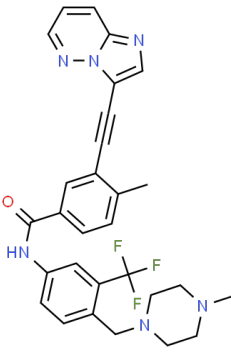  | 16       | Tyrosine kinase receptor inhibitor that used in the therapy of refractory chronic myelogenous leukemia (CML).                                            |
| 2 | Regorafenib   |  | 8        | Oral multi-kinase inhibitor used in the therapy of refractory metastatic colorectal cancer, hepatocellular carcinoma and gastrointestinal stromal tumor. |

|   |                   |                                                                                                                                                                                                                                                                                                                                                                                                                                                                                                                                                                                                                                                                                                                     |     |                                                                                                                              |
|---|-------------------|---------------------------------------------------------------------------------------------------------------------------------------------------------------------------------------------------------------------------------------------------------------------------------------------------------------------------------------------------------------------------------------------------------------------------------------------------------------------------------------------------------------------------------------------------------------------------------------------------------------------------------------------------------------------------------------------------------------------|-----|------------------------------------------------------------------------------------------------------------------------------|
| 3 | Sorafenib         | 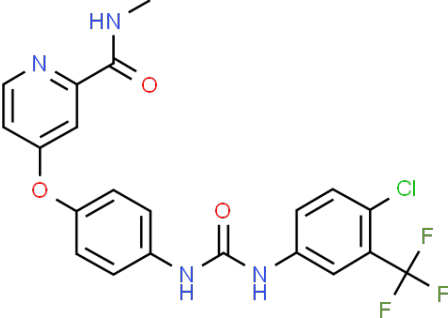 <p>The chemical structure of Sorafenib consists of a central benzene ring. At the 1-position, there is a methanesulfonyl group (-SO<sub>2</sub>CH<sub>3</sub>). At the 4-position, there is a pyridine ring connected via an oxygen atom (-O-pyridin-2-yl). At the 5-position, there is a bis(4-chloro-2,2-difluorophenyl)amino group (-NH-CO-NH-2,2-difluoro-4-chlorophenyl).</p>                                                                                                                                                                                                                                               | 8   | Protein kinase inhibitor used in the therapy of advanced renal cell, liver, and thyroid cancer.                              |
| 4 | Mitomycin C       |  <p>The chemical structure of Mitomycin C features a central 1,4-dihydroquinone core. It has a methyl group at position 2, an amino group (-NH<sub>2</sub>) at position 3, and a methyl group at position 4. At position 5, there is a side chain containing a bicyclic nitrogen-containing ring system (a decalin derivative) and a methyl ester group (-COOCH<sub>3</sub>).</p>                                                                                                                                                                                                                                                 | 0.5 | Antineoplastic antibiotic used in stomach and pancreatic cancers.                                                            |
| 5 | Tamoxifen citrate |  <p>The image shows two chemical structures. On the left is the citrate salt of Tamoxifen, represented as a central carbon atom bonded to a hydroxyl group (-OH), a carboxylic acid group (-COOH), and two carboxylate groups (-COO<sup>-</sup>). On the right is the Tamoxifen molecule, which consists of a central carbon-carbon double bond. One carbon of the double bond is bonded to an ethyl group (-CH<sub>2</sub>CH<sub>3</sub>) and a phenyl ring. The other carbon is bonded to another phenyl ring and a 4-(dimethylaminoethoxy)phenyl group (-O-CH<sub>2</sub>-CH<sub>2</sub>-N(CH<sub>3</sub>)<sub>2</sub>).</p> | 16  | Selective estrogen receptor modulator used in malignant glioma and other cancers overexpressing protein kinase C expression. |

|   |                              |                                                                                     |       |                                                                                                         |
|---|------------------------------|-------------------------------------------------------------------------------------|-------|---------------------------------------------------------------------------------------------------------|
| 6 | Actinomycin D                | 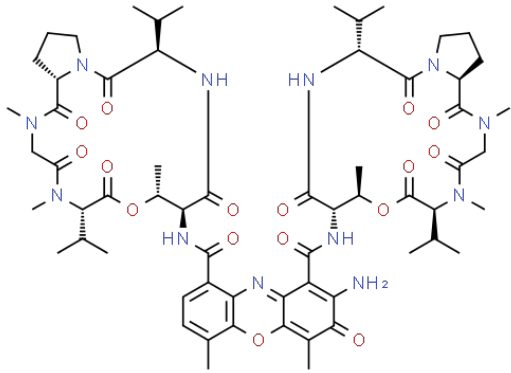  | 32    | Antineoplastic antibiotic used in treating solid tumors in children and choriocarcinoma in adult women. |
| 7 | Mithramycin A/<br>Plicamycin |  | ≤0.25 | Antineoplastic antibiotic used in the treatment of testicular cancer.                                   |

**Table S3: Initial screening data, chemical structure, and description of the hits for the natural product set III library against *C. difficile* ATCC BAA 1807:**

|  | Compound name | Chemical structure | MIC (μM) | Description and use |
|--|---------------|--------------------|----------|---------------------|
|--|---------------|--------------------|----------|---------------------|

|   |                 |                                                                                                                                                                                                                                                                                                                                                                                                                                                                                                                               |     |                                          |
|---|-----------------|-------------------------------------------------------------------------------------------------------------------------------------------------------------------------------------------------------------------------------------------------------------------------------------------------------------------------------------------------------------------------------------------------------------------------------------------------------------------------------------------------------------------------------|-----|------------------------------------------|
| 1 | Aureomycin      | 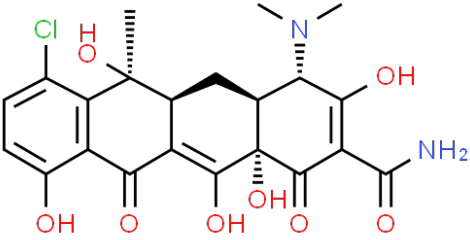 <p>The chemical structure of Aureomycin is a complex polycyclic molecule. It features a central benzene ring fused to a six-membered ring containing a nitrogen atom with two methyl groups. This is further fused to a five-membered ring with a carbonyl group and a hydroxyl group. The structure is highly substituted with various functional groups including a chlorine atom, multiple hydroxyl groups, and an amide group.</p>      | 0.5 | An antiprotozoal and antibacterial drug. |
| 2 | Norlobaric acid |  <p>The chemical structure of Norlobaric acid is a dimeric molecule consisting of two substituted benzene rings linked by two ether bridges. Each benzene ring has a hydroxyl group and a long alkyl chain. The structure is highly substituted with various functional groups including hydroxyl groups and a long alkyl chain.</p>                                                                                                        | 32  | --                                       |
| 3 | Actinomycin D   |  <p>The chemical structure of Actinomycin D is a complex polycyclic molecule. It features a central benzene ring fused to a six-membered ring containing a nitrogen atom with two methyl groups. This is further fused to a five-membered ring with a carbonyl group and a hydroxyl group. The structure is highly substituted with various functional groups including a chlorine atom, multiple hydroxyl groups, and an amide group.</p> | 32  | Antineoplastic antibiotic                |

|          |                     |                                                                                     |           |                                                                 |
|----------|---------------------|-------------------------------------------------------------------------------------|-----------|-----------------------------------------------------------------|
| <p>4</p> | <p>Valinomycin</p>  | 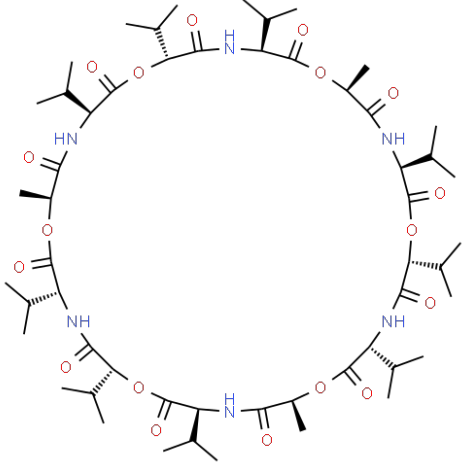   | <p>32</p> | <p>Antibiotic</p>                                               |
| <p>5</p> | <p>Pomiferin</p>    |   | <p>32</p> | <p>A prenylated isoflavone found in <i>Maclura pomifera</i></p> |
| <p>6</p> | <p>Aristolochin</p> |  | <p>32</p> | <p>Monocarboxylic acid found in <i>Aristolochia</i> sp.</p>     |

|   |                   |                                                                                     |             |                                                                                         |
|---|-------------------|-------------------------------------------------------------------------------------|-------------|-----------------------------------------------------------------------------------------|
| 7 | Mangostin         | 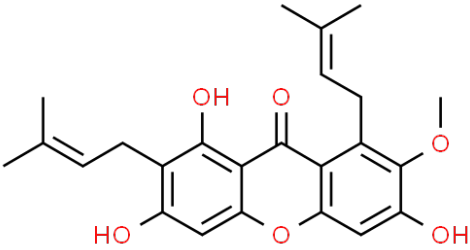   | 16          | Antineoplastic antibiotic isolated from the stems of <i>Cratoxylum cochinchinense</i> , |
| 8 | Siomycin A        |   | $\leq 0.25$ | Antibiotic, antineoplastic                                                              |
| 9 | Lonchocarpic acid |  | 32          | Isoflavonoid                                                                            |



|    |                               |                                                                                                                                     |       |                                              |
|----|-------------------------------|-------------------------------------------------------------------------------------------------------------------------------------|-------|----------------------------------------------|
| 10 | Tetrocarcin A,<br>sodium salt | 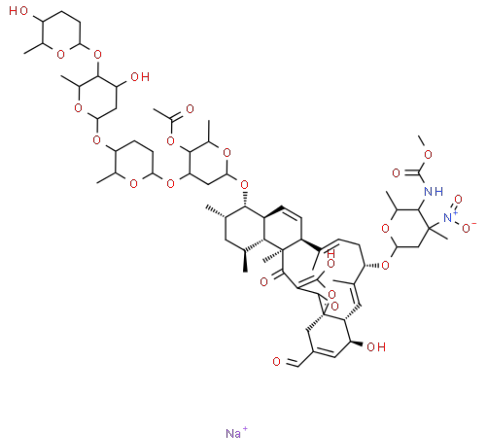 <p style="text-align: center;">Na<sup>+</sup></p> | 0.5   | Antitumor<br>antibiotics                     |
| 11 | Michellamine B                |                                                   | 16    | Novel plant alkaloid<br>inhibiting HIV virus |
| 12 | Rifamycin                     |                                                  | ≤0.25 | Natural antibiotic                           |

|    |                   |                                                                                     |       |                                                               |
|----|-------------------|-------------------------------------------------------------------------------------|-------|---------------------------------------------------------------|
| 13 | Nigericin         | 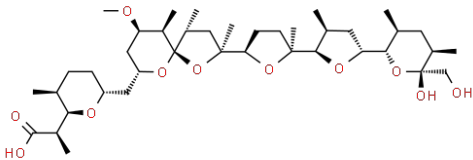   | ≤0.25 | Polyether antibiotic                                          |
| 14 | Antibiotic X-536A |   | 1     | --                                                            |
| 15 | Chaetochromin     |  | 0.5   | Small molecule obtained from <i>Chaetomium gracile</i> fungi. |

|    |           |                                                                                    |       |                                                                       |
|----|-----------|------------------------------------------------------------------------------------|-------|-----------------------------------------------------------------------|
| 16 | Levomycin | 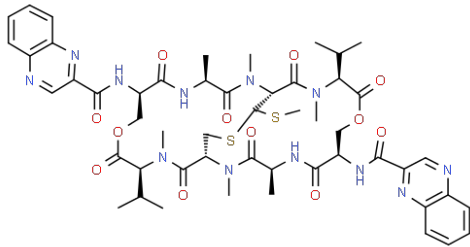  | ≤0.25 | Polypeptide antibiotic                                                |
| 17 | Gangetin  |  | 8     | Hexane extract from the root of the plant <i>Desmodium gangeticum</i> |
